# Supplementary material for: Impact of α-Globin Gene Expression and α-Globin Modifiers on the Phenotype of β-Thalassemia and Other Hemoglobinopathies: Implications for Patient Management
Source: MDPI journal article supplement (doi:10.3390/ijms25063400), 2024-03-17
Supplement: s1 [file s1]

Supplementary Table S1: Summary of selected published studies of cases with heterozygous beta-thalassemia and five functional alpha globin genes (clinical phenotypes are referred to as evaluated by authors in each article)

|                              | Mode of case recruitment |                                     | Number of cases                                 | Hematological Phenotype of cases                                                                                                                                                                         | Clinical phenotype of cases                                                                                                                                                                                                                                                                                                                                                                                                                                           | Conclusions – effect on hematological and/or clinical phenotype relative to simple $\beta$ -thalassemia heterozygotes |
|------------------------------|--------------------------|-------------------------------------|-------------------------------------------------|----------------------------------------------------------------------------------------------------------------------------------------------------------------------------------------------------------|-----------------------------------------------------------------------------------------------------------------------------------------------------------------------------------------------------------------------------------------------------------------------------------------------------------------------------------------------------------------------------------------------------------------------------------------------------------------------|-----------------------------------------------------------------------------------------------------------------------|
|                              | Phenotype driven         | Genotype identified retrospectively |                                                 |                                                                                                                                                                                                          |                                                                                                                                                                                                                                                                                                                                                                                                                                                                       |                                                                                                                       |
| Traeger-Synodinos et al 1996 | ✓                        | ✓                                   | 11 adults (6 children excluded from this table) | Hb: 10.2±1.1g/dl<br>MCV: 66.7±5.0 fl<br>HbF: 4.9±2.5%<br>Retics: 3.0±1.4%                                                                                                                                | 5/11 with atypical $\beta$ -thal heterozygotes with moderate anemia and/or mild jaundice                                                                                                                                                                                                                                                                                                                                                                              | Usually exacerbates hematological phenotype                                                                           |
| Camaschella et al 1997       | ✓                        | ✓                                   | 17 cases                                        | <b>Range of values in:</b><br><b>Mild cases</b><br>Hb: (10g/dl-12.7g/dl)<br>MCV: (59fl-73fl)<br>HbF: (0.9%-5%)<br><b>Severe cases</b><br>Hb: (6.5g/dl-11.0g/dl)<br>MCV: (60fl-79fl)<br>HbF: (1.5%-13.6%) | 6/17 had <b>mild anemia</b> with microcytosis and hypochromia<br><br>11/17 <b>more severe anemia</b><br>3/11 had splenomegaly requiring splenectomy<br>4/11 requiring blood transfusions                                                                                                                                                                                                                                                                              | Usually exacerbates hematological phenotype<br>Hematological and clinical variability                                 |
| Ma et al 2001                | ✓                        | ✓                                   | 8 cases                                         | <b>Range of values in TI* cases</b><br>Hb: (7.3g/dl-9.0g/dl)<br>MCV: (69fl-73.6fl)<br>HbF: (0.7%-19.2%)                                                                                                  | 2/8 had thalassemia trait<br>6/8 characterized as TI*                                                                                                                                                                                                                                                                                                                                                                                                                 | Usually exacerbates hematological phenotype<br>Hematological and clinical variability                                 |
| Theodoridou et al 2020       |                          | ✓                                   | 24 cases                                        | <b>Range of values in</b><br>Hb: (6.7g/dl-12.7g/dl)<br>MCV: (55fl-73.6fl)<br>HbF: (0.7%-19.2%)                                                                                                           | Great clinical and hematological heterogeneity from asymptomatic to severe TI*. 8/14 females transfused sporadically during pregnancy, older age, surgery or cancer. Blood transfusion requirements, apparently associated with underlying HBB genotypes, comorbidities and sex, as based on observation that no male patients in studied group had transfusions, regardless the HBB genotype, while 57.1% of females were transfused, most of them during pregnancy. | Usually exacerbates hematological phenotype<br>Hematological and clinical variability                                 |
| Sundaresan et al 2022        |                          | ✓                                   | 47/61010 referrals (mixed phenotype)            | Hb: 9.0±1.9g/dl,<br>MCV: 69.3±6.8<br>HbF: 4.2± 3.2%<br>Retics: 2.6.0±1.8%                                                                                                                                | 16/47 (34%) were asymptomatic or minimally symptomatic.<br>30/47 (63,8%) had a NTDT-phenotype.<br>1/47 became transfusion-dependent at 20 years. From 30 cases, with available transfusion history, 12 had required at least one transfusion.<br>From 28 cases with available data 75%, had splenomegaly and 56% had hepatomegaly. Cases with intermediate phenotype had significantly lower Hb and higher HbF levels than asymptomatic ones.                         | Usually exacerbates hematological phenotype<br>Hematological and clinical variability                                 |

|                       |   |   |                                     |                                                                                                                                                                                                                                                                                                                                                                                                                               |                                                                                  |                                                                                                            |
|-----------------------|---|---|-------------------------------------|-------------------------------------------------------------------------------------------------------------------------------------------------------------------------------------------------------------------------------------------------------------------------------------------------------------------------------------------------------------------------------------------------------------------------------|----------------------------------------------------------------------------------|------------------------------------------------------------------------------------------------------------|
| Ropero et al 2022     |   | ✓ | 64 cases                            | <b>Mean &amp;/or range of values in:</b><br><b>Thalassemia trait</b><br>Hb: 12.8g/dl (11.6-13.8)<br>MCV: (58.7fl-68.7fl)<br>HbF: 1.3% (0.4-3.0)<br>Retics: 1.2% (0.6-1.8)<br><b>Mild TI*</b><br>Hb: 10.0g/dl (8.3-11.4)<br>MCV: 64.5fl (55.8-81.3)<br>HbF: 3.7% (0.3-10.1)<br>Retics: 2.7% (0.2-12.0)<br><b>Severe TI*</b><br>Hb: 7.8g/dl (7.2-8.9)<br>MCV: (56.2fl-78.7fl)<br>Retics: 3.1% (1.7-5.1)<br>HbF: 5.2% (0.8-21.7) | 9/64 had thalassemia trait<br><br>39/64 had mild TI*<br><br>16/64 had severe TI* | Usually exacerbates hematological phenotype<br>Hematological and clinical variability                      |
| Gurunathan et al 2020 | ✓ |   | 5 non-related individuals with NTDT | <b>range of values:</b><br>Hb: 8.1-10,3g/dl<br>MCV: 54.7-63.7fl<br>HbF: 2.3%- 16%                                                                                                                                                                                                                                                                                                                                             | NTDT**                                                                           | Exacerbates hematological phenotype<br>α-globin gene copy number is a phenotypic modifier of β-thalassemia |
| Giordano et al 2009   | ✓ |   | 12/3500 individuals tested          | No significant differences compared to β-thalassemia heterozygotes                                                                                                                                                                                                                                                                                                                                                            | Typical β-thalassemia trait                                                      | No effect observed                                                                                         |
| Hamid et al 2021      | ✓ |   | 67/4005 β-thalassemia heterozygotes | No significant differences compared to β-thalassemia heterozygotes                                                                                                                                                                                                                                                                                                                                                            | Typical β-thalassemia trait                                                      | No effect observed                                                                                         |

\*TI = Thalassemia Intermedia

\*\*NTDT
